# Supplementary material for: Comparison of inertial records during anticipatory postural adjustments obtained with devices of different masses
Source: PeerJ. 2023 Jul 12;11:e15627. doi: 10.7717/peerj.15627 (PMC10349560; doi:10.7717/peerj.15627)
Supplement: Supplemental Information 1 [file peerj-11-15627-s001.xlsx]

## Sheet: APA onset
KinemAPAonsetT	MobileAPAonsetT	MbientAPA onset T		KinemAPAonsetRE	MobileAPAonsetRE	MbientAPA onset RE
-0.6333	-0.63329	-0.6354		-0.66	-0.6389	-0.6151
-0.6333	-0.6114	-0.6039		-0.7167	-0.7451	-0.7495
-0.63333	-0.59322	-0.5728		-0.6083	-0.6249	-0.6327
-0.4583	-0.4425	-0.4468		-0.5	-0.4897	-0.5108
-0.625	-0.60139	-0.5994		-0.56667	-0.5854	-0.59108
-0.63335	-0.63366	-0.6301		-0.5417	-0.5538	-0.54598
-0.5	-0.4898	-0.5071		-0.5583	-0.57812	-0.55901
-0.6583	-0.6491	-0.6476		-0.7917	-0.7934	-0.7796
-0.7	-0.69	-0.6774		-0.625	-0.6094	-0.6179
-0.6167	-0.609	-0.6188		-0.625	-0.6171	-0.6266
-0.63335	-0.625	-0.63		-0.625	-0.62569	-0.6179
-0.3333	-0.3612	-0.35427		-0.8417	-0.8244	-0.8232
-0.60001	-0.61734	-0.6186		-0.60001	-0.6075	-0.6013
-0.6	-0.61	-0.5942		-0.6167	-0.61734	-0.6226
-0.6083	-0.585	-0.6007		-0.60832	-0.62532	-0.6213
-0.61667	-0.61714	-0.6403		-0.7	-0.6969	-0.6872
-0.6167	-0.625	-0.6215		-0.8333	-0.8165	-0.824
-0.56667	-0.5717	-0.5308		-0.5417	-0.5607	-0.5681
-0.6167	-0.6335	-0.6392		-0.8417	-0.8432	-0.8144
-0.62502	-0.63347	-0.6155		-0.7083	-0.7005	-0.727
-0.52499	-0.5055	-0.5066		-0.5083	-0.5083	-0.5066

## Sheet: APA amplitude
KInemAPAampT	MObileAPAampT	MbientAPAamplitudeT		KInemAPAampRE	MObileAPAampRE	MbientAPAamplitudeR
-0.17694	-0.19186	-0.19321		-0.12226	-0.056407	-0.055391
-0.24569	-0.25175	-0.21922		-0.1574	-0.19568	-0.11896
-0.33566	-0.46091	-0.26395		-0.13922	-0.23192	-0.20945
-0.25731	-0.18342	-0.16864		-0.34905	-0.36884	-0.34462
-0.40484	-0.39413	-0.39144		-0.31876	-0.2814	-0.33091
-0.18759	-0.16691	-0.1095		-0.49197	-0.4889	-0.56961
-0.28424	-0.33491	-0.28087		-0.31728	-0.36659	-0.2622
-0.13447	-0.061333	-0.048323		-0.058285	-0.06853	-0.10017
-0.20113	-0.1452	-0.083561		-0.32825	-0.29368	-0.28585
-0.32133	-0.39762	-0.33225		-0.21338	-0.14187	-0.14224
-0.32806	-0.29894	-0.25455		-0.19476	-0.19456	-0.15872
-0.35055	-0.36041	-0.28762		-0.055345	-0.053706	-0.028055
-0.31521	-0.33579	-0.22805		-0.26305	-0.38536	-0.36505
-0.32472	-0.4082	-0.31458		-0.32472	-0.4082	-0.31458
-0.41485	-0.53184	-0.49822		-0.55052	-0.62096	-0.5649
-0.26624	-0.27007	-0.21672		-0.26622	-0.27009	-0.21672
-0.31465	-0.32979	-0.33676		-0.097696	-0.40453	-0.15112
-0.32482	-0.31652	-0.34134		-0.19241	-0.3646	-0.23379
-0.43365	-0.15941	-0.37477		-0.29663	-0.26485	-0.2236
-0.36284	-0.41582	-0.2166		-0.14619	-0.1427	-0.10212
-0.33883	-0.37759	-0.25419		-0.33883	-0.37759	-0.25419

## Sheet: APA TempoPico
KInemTempopicoT	MObileTempopicoT	MbientAPA timetoPeakT		KInemTempopicoRE	MObileTempopicoRE	MbientAPA onset toPeak R
0.35	0.38269	0.3906		0.235	0.204	0.2004
0.3416	0.2839	0.2992		0.2	0.2399	0.2192
0.53332	0.52641	0.36312		0.2583	0.2553	0.2345
0.175	0.1752	0.1283		0.3167	0.2711	0.1423
0.30833	0.31889	0.3419		0.25837	0.3188	0.23252
0.34165	0.35838	0.3434		0.2084	0.2391	0.22702
0.15	0.1595	0.1721		0.25	0.24898	0.15234
0.1416	0.1755	0.1522		0.1583	0.118	0.1322
0.375	0.3985	0.4203		0.3417	0.2312	0.3213
0.2584	0.2394	0.2933		0.2167	0.1643	0.1911
0.27501	0.3	0.2644		0.27499	0.27874	0.348
0.2583	0.255	0.3033		0.2	0.1915	0.195
0.13333	0.16741	0.2543		0.24171	0.3139	0.2635
0.25	0.3036	0.1994		0.2667	0.3109	0.2278
0.2916	0.2394	0.3125		0.22499	0.27902	0.2201
0.25833	0.25524	0.2346		0.3417	0.335	0.2815
0.35	0.36	0.3256		0.1583	0.5423	0.5768
0.5	0.47259	0.42228		0.2	0.2354	0.2204
0.2834	0.2072	0.2005		0.3	0.3607	0.342
0.52501	0.58963	0.4201		0.1416	0.2368	0.229
0.34999	0.3111	0.3084		0.3333	0.3139	0.3084
